# Supplementary material for: Knockdown of stem cell regulator Oct4A in ovarian cancer reveals cellular reprogramming associated with key regulators of cytoskeleton-extracellular matrix remodelling
Source: PubMed Central journal article supplement (PMC5390261; doi:10.1038/srep46312), 2017-04-13
Supplement: srep46312-s2.pdf [file srep46312-s2.pdf]

## References in Tables (1-7):

### **Manuscript title: Knockdown of stem cell regulator Oct4A in ovarian cancer reveals cellular reprogramming associated with key regulators of cytoskeleton-extracellular matrix remodelling**

**Authors: Chantel Samardzija, David W Greening<sup>2</sup>, Ruth Escalona, Maoshan Chen, Maree Bilandzic, Rodney Luwor, George Kannourakis, Jock K Findlay and Nuzhat Ahmed**

1. Anderson, A.S., et al., Ovarian tumor-initiating cells display a flexible metabolism. *Experimental Cell Research*, 2014. 328(1): p. 44-57.
2. Antoniel, M., et al., The Oligomycin-Sensitivity Conferring Protein of Mitochondrial ATP Synthase: Emerging New Roles in Mitochondrial Pathophysiology. *International Journal of Molecular Sciences*, 2014. 15(5): p. 7513-7536.
3. Arbabian, A., et al., Endoplasmic reticulum calcium pumps and cancer. *Biofactors*, 2011. 37(3): p. 139-49.
4. Assinder, S.J., et al., A novel splice variant of the beta-tropomyosin (TPM2) gene in prostate cancer. *Mol Carcinog*, 2010. 49(6): p. 525-31.
5. Aumailley, M., The laminin family. *Cell Adh Migr*, 2013. 7(1): p. 48-55.
6. Avraham-Davidi, I., et al., ApoB-containing lipoproteins regulate angiogenesis by modulating expression of VEGF receptor 1. *Nature Medicine*, 2012. 18(6): p. 967-973.
7. Bengtsson, E., et al., The leucine-rich repeat protein PRELP binds perlecan and collagens and may function as a basement membrane anchor. *J Biol Chem*, 2002. 277(17): p. 15061-8.
8. Bharadwaj, S. and G.L. Prasad, Tropomyosin-1, a novel suppressor of cellular transformation is downregulated by promoter methylation in cancer cells. *Cancer Lett*, 2002. 183(2): p. 205-13.
9. Bhardwaj, A., et al., Restoration of PPP2CA expression reverses epithelial-to-mesenchymal transition and suppresses prostate tumour growth and metastasis in an orthotopic mouse model. *Br J Cancer*, 2014. 110(8): p. 2000-10.
10. Bonavita, E., et al., PTX3 Is an Extrinsic Oncosuppressor Regulating Complement-Dependent Inflammation in Cancer. *Cell*, 2015. 160(4): p. 700-714.
11. Borodovsky, A., M.J. Seltzer, and G.J. Riggins, Altered cancer cell metabolism in gliomas with mutant IDH1 or IDH2. *Current Opinion in Oncology*, 2012. 24(1): p. 83-89.
12. Brachner, A. and R. Foisner, Lamina-associated polypeptide (LAP)2? and other LEM proteins in cancer biology. *Advances In Experimental Medicine And Biology*, 2014. 773: p. 143-163.
13. Buijs, J.T., et al., The BMP2/7 heterodimer inhibits the human breast cancer stem cell subpopulation and bone metastases formation. *Oncogene*, 2012. 31(17): p. 2164-74.

14. Cao, L., et al., Tissue transglutaminase protects epithelial ovarian cancer cells from cisplatin-induced apoptosis by promoting cell survival signaling. *Carcinogenesis*, 2008. 29(10): p. 1893-900.
15. Carracedo, A., L.C. Cantley, and P.P. Pandolfi, Cancer metabolism: fatty acid oxidation in the limelight. *Nat Rev Cancer*, 2013. 13(4): p. 227-232.
16. Chen, I. and D.J. Roufa, The transcriptionally active human ribosomal protein S17 gene. *Gene*, 1988. 70(1): p. 107-116.
17. Chen, P., M. Cescon, and P. Bonaldo, Collagen VI in cancer and its biological mechanisms. *Trends in Molecular Medicine*, 2013. 19(7): p. 410-417.
18. Chen, S., et al., Proteomic analysis of the proteins that are associated with the resistance to paclitaxel in human breast cancer cells. *Mol Biosyst*, 2014. 10(2): p. 294-303.
19. Chen, X., et al., Leukotriene A4 hydrolase as a target for cancer prevention and therapy. *Curr Cancer Drug Targets*, 2004. 4(3): p. 267-83.
20. Cheng, T.Y., et al., Annexin A1 is associated with gastric cancer survival and promotes gastric cancer cell invasiveness through the formyl peptide receptor/extracellular signal-regulated kinase/integrin beta-1-binding protein 1 pathway. *Cancer*, 2012. 118(23): p. 5757-67.
21. Chiang, K.P., et al., An enzyme that regulates ether lipid signaling pathways in cancer annotated by multidimensional profiling. *Chem Biol*, 2006. 13(10): p. 1041-50.
22. Christoforidis, S., et al., The Rab5 effector EEA1 is a core component of endosome docking. *Nature*, 1999. 397(6720): p. 621-5.
23. Chu, S.-H., et al., Regulation of survival and chemoresistance by HSP90AA1 in ovarian cancer SKOV3 cells. *Molecular Biology Reports*, 2013. 40(1): p. 1-6.
24. Dai, H.Y., et al., Carbonic anhydrase III promotes transformation and invasion capability in hepatoma cells through FAK signaling pathway. *Mol Carcinog*, 2008. 47(12): p. 956-63.
25. Dai, R.P., et al., Histone 2B (H2B) expression is confined to a proper NAD<sup>+</sup>/NADH redox status. *J Biol Chem*, 2008. 283(40): p. 26894-901.
26. Delanote, V., J. Vandekerckhove, and J. Gettemans, Plastins: versatile modulators of actin organization in (patho)physiological cellular processes. *Acta Pharmacol Sin*, 2005. 26(7): p. 769-79.
27. Demali, K.A., Vinculin--a dynamic regulator of cell adhesion. *Trends Biochem Sci*, 2004. 29(11): p. 565-7.
28. Ding, Z., Y.H. Bae, and P. Roy, Molecular insights on context-specific role of profilin-1 in cell migration. *Cell Adhesion & Migration*, 2012. 6(5): p. 442-449.
29. Djinic-Carugo, K., et al., The spectrin repeat: a structural platform for cytoskeletal protein assemblies. *FEBS Letters*, 2002. 513(1): p. 119-123.
30. Doe, R.P., et al., Estrogen Dosage Effects on Serum Proteins: A Longitudinal Study. *The Journal of Clinical Endocrinology & Metabolism*, 1967. 27(8): p. 1081-1086.
31. Dubourg, C., et al., Evaluation of ETF1/eRF1, mapping to 5q31, as a candidate myeloid tumor suppressor gene. *Cancer Genetics and Cytogenetics*, 2002. 134(1): p. 33-37.

32. Emori, M., et al., High expression of CD109 antigen regulates the phenotype of cancer stem-like cells/cancer-initiating cells in the novel epithelioid sarcoma cell line ESX and is related to poor prognosis of soft tissue sarcoma. *PLoS One*, 2013. 8(12).
33. Esteller, M., Non-coding RNAs in human disease. *Nat Rev Genet*, 2011. 12(12): p. 861-874.
34. Flavin, P., et al., RuvB12 cooperates with Ets2 to transcriptionally regulate hTERT in colon cancer. *FEBS Letters*, 2011. 585(15): p. 2537-2544.
35. Fong, S., et al., Functional identification of distinct sets of antitumor activities mediated by the FKBP gene family. *Proceedings of the National Academy of Sciences of the United States of America*, 2003. 100(24): p. 14253-14258.
36. Garg, M., G. Braunstein, and H.P. Koeffler. LAMC2 as a therapeutic target for cancers. 2014.
37. Garneau, D., et al., Heterogeneous Nuclear Ribonucleoprotein F/H Proteins Modulate the Alternative Splicing of the Apoptotic Mediator Bcl-x. *Journal of Biological Chemistry*, 2005. 280(24): p. 22641-22650.
38. Gaude, E. and C. Frezza, Defects in mitochondrial metabolism and cancer. *Cancer & Metabolism*, 2014. 2: p. 10-10.
39. Ghiselli, G., SMC3 knockdown triggers genomic instability and p53-dependent apoptosis in human and zebrafish cells. *Mol Cancer*, 2006. 5: p. 52.
40. Gilkes, D.M., et al., Procollagen lysyl hydroxylase 2 is essential for hypoxia-induced breast cancer metastasis. *Mol Cancer Res*, 2013. 11(5): p. 456-66.
41. Gomes-Giacoia E, Miyake M, Goodison S, Rosser CJ. Targeting Plasminogen Activator Inhibitor-1 Inhibits Angiogenesis and Tumor Growth in a Human Cancer Xenograft Model. *Molecular cancer therapeutics*. 2013;12(12):2697-708.
42. Guo, C., et al., ACTB in cancer. *Clinica Chimica Acta*, 2013. 417: p. 39-44.
43. Gupta, D. and C.G. Lis, Pretreatment serum albumin as a predictor of cancer survival: a systematic review of the epidemiological literature. *Nutr J*, 2010. 9: p. 69.
44. Haase, M. and G. Fitze, HSP90AB1: Helping the good and the bad. *Gene*, 2015.
45. Habashy, H.O., et al., Transferrin receptor (CD71) is a marker of poor prognosis in breast cancer and can predict response to tamoxifen. *Breast Cancer Research And Treatment*, 2010. 119(2): p. 283-293.
46. Hamm, A., et al., Frequent expression loss of Inter-alpha-trypsin inhibitor heavy chain (ITIH) genes in multiple human solid tumors: a systematic expression analysis. *BMC Cancer*, 2008. 8(25): p. 1471-2407.
47. Helleday, T., et al., DNA repair pathways as targets for cancer therapy. *Nat Rev Cancer*, 2008. 8(3): p. 193-204.
48. Hiroshima, Y., et al., Collapsin response mediator protein 4 expression is associated with liver metastasis and poor survival in pancreatic cancer. *Ann Surg Oncol*, 2013. 20 Suppl 3: p. S369-78.
49. Hoeflich, K.P. and M. Ikura, Radixin: cytoskeletal adopter and signaling protein. *Int J Biochem Cell Biol*, 2004. 36(11): p. 2131-6.

50. Holloway, R.W., et al., Stromal Adipocyte Enhancer-binding Protein (AEBP1) Promotes Mammary Epithelial Cell Hyperplasia via Proinflammatory and Hedgehog Signaling. *Journal of Biological Chemistry*, 2012. 287(46): p. 39171-39181.
51. Honma, K., et al., RPN2 gene confers docetaxel resistance in breast cancer. *Nat Med*, 2008. 14(9): p. 939-48.
52. Hu, C.E., et al., The RNA-binding protein PCBP2 facilitates gastric carcinoma growth by targeting miR-34a. *Biochem Biophys Res Commun*, 2014. 448(4): p. 437-42.
53. Hu, L., et al., Biglycan enhances gastric cancer invasion by activating FAK signaling pathway. *Oncotarget*, 2014. 5(7): p. 1885-1896.
54. Hua, M., et al., CAP1 is overexpressed in human epithelial ovarian cancer and promotes cell proliferation. *Int J Mol Med*, 2015. 35(4): p. 941-9.
55. Huang, H., et al., [Establishment of drug resistant cell line of MGC-803 and analysis of differential secretome]. *Beijing Da Xue Xue Bao*, 2014. 46(2): p. 183-9.
56. Huang, J., et al., HMGB1 Promotes Drug Resistance in Osteosarcoma. *Cancer Research*, 2012. 72(1): p. 230-238.
57. Huh, Y.H., et al., Swiprosin-1 stimulates cancer invasion and metastasis by increasing the Rho family of GTPase signaling. *Oncotarget*, 2015. 6(15): p. 13060-13071.
58. Ji, W., et al., AIP1 Expression in Tumor Niche Suppresses Tumor Progression and Metastasis. *Cancer Res*, 2015. 75(17): p. 3492-504.
59. Jian, J., et al., Fibromodulin promoted in vitro and in vivo angiogenesis. *Biochemical and Biophysical Research Communications*, 2013. 436(3): p. 530-535.
60. Jones, N., et al., Tie receptors: new modulators of angiogenic and lymphangiogenic responses. *Nature Reviews. Molecular Cell Biology*, 2001. 2(4): p. 257-267.
61. Kang, J.U., et al., AMY2A: a possible tumor-suppressor gene of 1p21.1 loss in gastric carcinoma. *Int J Oncol*, 2010. 36(6): p. 1429-35.
62. Kanwal, R., et al., Protection against oxidative DNA damage and stress in human prostate by glutathione S-transferase P1. *Molecular Carcinogenesis*, 2014. 53(1): p. 8-18.
63. Katada, K., et al., Plectin promotes migration and invasion of cancer cells and is a novel prognostic marker for head and neck squamous cell carcinoma. *Journal of Proteomics*, 2012. 75(6): p. 1803-1815.
64. Katzenellenbogen, R.A., et al., Cytoplasmic Poly(A) Binding Proteins Regulate Telomerase Activity and Cell Growth in Human Papillomavirus Type 16 E6-Expressing Keratinocytes. *Journal of Virology*, 2010. 84(24): p. 12934-12944.
65. Kawabe, T., et al., Differential regulation of human RecQ family helicases in cell transformation and cell cycle. *Oncogene*, 2000. 19(41): p. 4764-72.
66. Kennedy, D., et al., Regulation of apoptosis by heat shock proteins. *IUBMB Life*, 2014. 66(5): p. 327-338.
67. Kim, H., et al., Increased CD13 Expression Reduces Reactive Oxygen Species, Promoting Survival of Liver Cancer Stem Cells via an Epithelial-Mesenchymal Transition-like Phenomenon. *Annals of Surgical Oncology*, 2012. 19(3): p. 539-548.

68. Kim, Y.C., R. Gonzalez-Nieves, and M.L. Cutler, Rsu1 contributes to cell adhesion and spreading in MCF10A cells via effects on P38 map kinase signaling. *Cell Adh Migr*, 2015. 9(3): p. 227-32.
69. Klier, F.G., et al., Amyloid  $\beta$ -protein precursor is associated with extracellular matrix. *Brain Research*, 1990. 515(1-2): p. 336-342.
70. Kobayashi, T., et al., Activation of the ribosomal protein L13 gene in human gastrointestinal cancer. *Int J Mol Med*, 2006. 18(1): p. 161-70.
71. Kovac, S., G.J. Anderson, and G.S. Baldwin, Gastrins, iron homeostasis and colorectal cancer. *Biochimica et Biophysica Acta (BBA) - Molecular Cell Research*, 2011. 1813(5): p. 889-895.
72. Kurian, J.R., et al., Reductive detoxification of arylhydroxylamine carcinogens by human NADH cytochrome b5 reductase and cytochrome b5. *Chem Res Toxicol*, 2006. 19(10): p. 1366-73.
73. Lai, M.-C., et al., DDX3 Regulates Cell Growth through Translational Control of Cyclin E1. *Molecular and Cellular Biology*, 2010. 30(22): p. 5444-5453.
74. Langhoff, E., et al., Cathepsin D expression in pancreatic ductal adenocarcinoma (PDAC) cells increases proliferation and reduces survival of pancreatic cancer patients. *Pancreatology*. 15(3): p. S20.
75. Lee, I.H., et al., Ahnak functions as a tumor suppressor via modulation of TGFbeta/Smad signaling pathway. *Oncogene*, 2014. 33(38): p. 4675-84.
76. Lee, S.Y., et al., Microtubule-associated protein 1B light chain (MAP1B-LC1) negatively regulates the activity of tumor suppressor p53 in neuroblastoma cells. *FEBS Lett*, 2008. 582(19): p. 2826-32.
77. Li, J., et al., miR-27a regulates cisplatin resistance and metastasis by targeting RKIP in human lung adenocarcinoma cells. *Molecular Cancer*, 2014. 13: p. 193.
78. Li, L., et al., Ribonuclease inhibitor up-regulation inhibits the growth and induces apoptosis in murine melanoma cells through repression of angiogenin and ILK/PI3K/AKT signaling pathway. *Biochimie*, 2014. 103: p. 89-100.
79. Li, M., et al., Alpha-fetoprotein receptor as an early indicator of HBx-driven hepatocarcinogenesis and its applications in tracing cancer cell metastasis. *Cancer Letters*, 2013. 330(2): p. 170-180.
80. Li, X., et al., Characterization of adult alpha- and beta-globin elevated by hydrogen peroxide in cervical cancer cells that play a cytoprotective role against oxidative insults. *PLoS One*, 2013. 8(1): p. 17.
81. Li, X.-H., et al., Knockdown of creatine kinase B inhibits ovarian cancer progression by decreasing glycolysis. *The International Journal of Biochemistry & Cell Biology*, 2013. 45(5): p. 979-986.
82. Li, Z., et al., The VHL protein recruits a novel KRAB-A domain protein to repress HIF-1 $\alpha$  transcriptional activity. *The EMBO Journal*, 2003. 22(8): p. 1857-1867.
83. Lindner, I., et al.,  $\beta$ 2-Macroglobulin Inhibits the Malignant Properties of Astrocytoma Cells by Impeding  $\beta$ -Catenin Signaling. *Cancer Research*, 2010. 70(1): p. 277-287.
84. Liu, H., et al., RKIP promotes cisplatin-induced gastric cancer cell death through NF- $\kappa$ B/Snail pathway. *Tumour Biol*, 2015. 36(3): p. 1445-53.

85. Liu, T.-A., et al., 14-3-3 $\gamma$  Overexpression Contributes to Epithelial-Mesenchymal Transition of Hepatocellular Carcinoma. *PLoS ONE*, 2013. 8(3): p. e57968.
86. Liu, X.F., et al., A primate-specific POTE-actin fusion protein plays a role in apoptosis. *Apoptosis*, 2009. 14(10): p. 1237-44.
87. Liu, Z., et al., PDZ and LIM domain protein 1(PDLIM1)/CLP36 promotes breast cancer cell migration, invasion and metastasis through interaction with alpha-actinin. *Oncogene*, 2015. 34(10): p. 1300-11.
88. Lo, Y.-W., et al., Mitochondrial proteomics with siRNA knockdown to reveal ACAT1 and MDH2 in the development of doxorubicin-resistant uterine cancer. *Journal of Cellular and Molecular Medicine*, 2015. 19(4): p. 744-759.
89. Lokman, N.A., et al., Annexin A2 is regulated by ovarian cancer-peritoneal cell interactions and promotes metastasis. *Oncotarget*, 2013. 4(8): p. 1199-1211.
90. Lu, D., et al., Cytoskeletal protein 4.1G is a binding partner of the metabotropic glutamate receptor subtype 1 alpha. *J Neurosci Res*, 2004. 78(1): p. 49-55.
91. Lynch, D.K., et al., A Cortactin-CD2-associated protein (CD2AP) complex provides a novel link between epidermal growth factor receptor endocytosis and the actin cytoskeleton. *J Biol Chem*, 2003. 278(24): p. 21805-13.
92. Lyssiotis, C., et al., Pancreatic cancers depend on a non-canonical glutamine metabolism pathway. *Cancer & Metabolism*, 2014. 2(1): p. 1-1.
93. Lyssiotis, C.A., et al., Pancreatic cancers rely on a novel glutamine metabolism pathway to maintain redox balance. *Cell Cycle*, 2013. 12(13): p. 1987-1988.
94. Marti, A., et al., Actin-binding protein-280 binds the stress-activated protein kinase (SAPK) activator SEK-1 and is required for tumor necrosis factor-alpha activation of SAPK in melanoma cells. *J Biol Chem*, 1997. 272(5): p. 2620-8.
95. Maruyama, Y., et al., Short Hairpin RNA Library-Based Functional Screening Identified Ribosomal Protein L31 That Modulates Prostate Cancer Cell Growth via p53 Pathway. *PLoS ONE*, 2014. 9(10): p. e108743.
96. McCarroll, J. and M. Kavallaris, *Microtubules, Drug Resistance, and Tumorigenesis, in Cytoskeleton and Human Disease*, M. Kavallaris, Editor. 2012, Humana Press. p. 223-240.
97. McLennan, A.G., The Nudix hydrolase superfamily. *Cellular And Molecular Life Sciences: CMLS*, 2006. 63(2): p. 123-143.
98. McMahon, H.T. and E. Boucrot, Molecular mechanism and physiological functions of clathrin-mediated endocytosis. *Nature Reviews. Molecular Cell Biology*, 2011. 12(8): p. 517-533.
99. Melchior, A., et al., Cyclophilin B induces integrin-mediated cell adhesion by a mechanism involving CD98-dependent activation of protein kinase C-delta and p44/42 mitogen-activated protein kinases. *Exp Cell Res*, 2008. 314(3): p. 616-28.
100. Mellor, A.L. and D.H. Munn, Tryptophan catabolism and T-cell tolerance: immunosuppression by starvation? *Immunology Today*, 1999. 20(10): p. 469-473.
101. Mendez, M. G., Kojima, S.-I. & Goldman, R. D. 2010. Vimentin induces changes in cell shape, motility, and adhesion during the epithelial to mesenchymal transition. *The FASEB Journal*, 24, 1838-1851.

102. Mercurius, K.O. and A.O. Morla, Cell adhesion and signaling on the fibronectin 1st type III repeat; requisite roles for cell surface proteoglycans and integrins. *BMC Cell Biol*, 2001. 2(18): p. 20.
103. Mirando, A.C., et al., Aminoacyl-tRNA synthetase dependent angiogenesis revealed by a bioengineered macrolide inhibitor. *Sci Rep*, 2015. 5(13160).
104. Modelska, A., et al., The malignant phenotype in breast cancer is driven by eIF4A1-mediated changes in the translational landscape. *Cell Death Dis*, 2015. 22(6): p. 542.
105. Moon, J.-S., et al., Krüppel-like factor 4 (KLF4) activates the transcription of the gene for the platelet isoform of phosphofructokinase (PFKP) in breast cancer. *The Journal Of Biological Chemistry*, 2011. 286(27): p. 23808-23816.
106. Moore, A.E., et al., Physiological networks and disease functions of RNA-binding protein AUF1. *Wiley Interdisciplinary Reviews. RNA*, 2014. 5(4): p. 549-564.
107. Moseley, J.B., et al., Twinfilin is an actin-filament-severing protein and promotes rapid turnover of actin structures in vivo. *J Cell Sci*, 2006. 119(Pt 8): p. 1547-57.
108. Moudry, P., et al., Ubiquitin-activating enzyme UBA1 is required for cellular response to DNA damage. *Cell Cycle*, 2012. 11(8): p. 1573-82.
109. Nakanishi, K., et al., Localization and function in endoplasmic reticulum stress tolerance of ERdj3, a new member of Hsp40 family protein. *Cell Stress & Chaperones*, 2004. 9(3): p. 253-264.
110. Neradil, J. and R. Veselska, Nestin as a marker of cancer stem cells. *Cancer Sci*, 2015. 106(7): p. 803-11.
111. Onda, M., et al., Decreased expression of haemoglobin beta (HBB) gene in anaplastic thyroid cancer and recovery of its expression inhibits cell growth. *Br J Cancer*, 2005. 92(12): p. 2216-2224.
112. Palmieri F. Mitochondrial transporters of the SLC25 family and associated diseases: a review. *Journal of Inherited Metabolic Disease*. 2014;37(4):565-75.
113. Pandey, P., et al., Amyloid precursor-like protein 2 (APLP2) affects the actin cytoskeleton and increases pancreatic cancer growth and metastasis. *Oncotarget*, 2015. 6(4): p. 2064-75.
114. Pappas, C.T., et al., The Nebulin family: an actin support group. *Trends in Cell Biology*, 2011. 21(1): p. 29-37.
115. Paris, S., et al., Inhibition of tumor growth and metastatic spreading by overexpression of inter-alpha-trypsin inhibitor family chains. *International Journal of Cancer*, 2002. 97(5): p. 615-620.
116. Pio, R., D. Ajona, and J.D. Lambris, Complement inhibition in cancer therapy. *Seminars in Immunology*, 2013. 25(1): p. 54-64.
117. Popowicz, G.M., et al., Filamins: promiscuous organizers of the cytoskeleton. *Trends Biochem Sci*, 2006. 31(7): p. 411-9.
118. Pyper, S.R., et al., PRIC295, a Nuclear Receptor Coactivator, Identified from PPAR $\gamma$ -Interacting Cofactor Complex. *PPAR Research*, 2010. 2010: p. 173907.
119. Riley, L.G., et al., Mutation of the mitochondrial tyrosyl-tRNA synthetase gene, YARS2, causes myopathy, lactic acidosis, and sideroblastic anemia-MLASA syndrome. *The American Journal of Human Genetics*, 2010. 87(1): p. 52-59.

120. Rohde, M., et al., Members of the heat-shock protein 70 family promote cancer cell growth by distinct mechanisms. *Genes & Development*, 2005. 19(5): p. 570-582.
121. Sakamoto, H., et al., Glyoxalase I is involved in resistance of human leukemia cells to antitumor agent-induced apoptosis. *Blood*, 2000. 95(10): p. 3214-8.
122. Sakwe, A.M., et al., Annexin A6 contributes to the invasiveness of breast carcinoma cells by influencing the organization and localization of functional focal adhesions. *Experimental cell research*, 2011. 317(6): p. 823-837.
123. Seaman, M.N.J., et al., Endosome to Golgi Retrieval of the Vacuolar Protein Sorting Receptor, Vps10p, Requires the Function of the VPS29, VPS30, and VPS35 Gene Products. *The Journal of Cell Biology*, 1997. 137(1): p. 79-92.
124. Shimokawa, T., et al., Identification of TOMM34, which shows elevated expression in the majority of human colon cancers, as a novel drug target. *Int J Oncol*, 2006. 29(2): p. 381-6.
125. Singer, R., et al., Drosophila COP9 signalosome subunit 7 interacts with multiple genomic loci to regulate development. *Nucleic Acids Res*, 2014. 42(15): p. 9761-70.
126. Singh, P., C. Carraher, and J.E. Schwarzbauer, Assembly of Fibronectin Extracellular Matrix. *Annual review of cell and developmental biology*, 2010. 26: p. 397-419.
127. Stordal, B., et al., Resistance to Paclitaxel in a Cisplatin-Resistant Ovarian Cancer Cell Line Is Mediated by P-Glycoprotein. *PLoS ONE*, 2012. 7(7): p. e40717.
128. Storr, S.J., et al., Calpain-2 expression is associated with response to platinum based chemotherapy, progression-free and overall survival in ovarian cancer. *Journal of Cellular and Molecular Medicine*, 2012. 16(10): p. 2422-2428.
129. Sudo, H., et al., Knockdown of COPA, identified by loss-of-function screen, induces apoptosis and suppresses tumor growth in mesothelioma mouse model. *Genomics*, 2010. 95(4): p. 210-6.
130. Sugimachi, K., et al., Aberrant Expression of Plastin-3 Via Copy Number Gain Induces the Epithelial-Mesenchymal Transition in Circulating Colorectal Cancer Cells. *Annals of Surgical Oncology*, 2014. 21(11): p. 3680-3690.
131. Sun, Y., J. Long, and Y. Zhou, Angiopoietin-like 4 promotes melanoma cell invasion and survival through aldolase A. *Oncol Lett*, 2014. 8(1): p. 211-217.
132. Sung, S.Y., et al., Targeting L1 cell adhesion molecule expression using liposome-encapsulated siRNA suppresses prostate cancer bone metastasis and growth. *Oncotarget*, 2014. 5(20): p. 9911-29.
133. Tedeschi, P.M., et al., Contribution of serine, folate and glycine metabolism to the ATP, NADPH and purine requirements of cancer cells. *Cell Death & Disease*, 2013. 4: p. e877-e877.
134. Tennant, D. and E. Gottlieb, HIF prolyl hydroxylase-3 mediates alpha-ketoglutarate-induced apoptosis and tumor suppression. *Journal of Molecular Medicine*, 2010. 88(8): p. 839-849.
135. Tolosano, E. and F. Altruda, Hemopexin: structure, function, and regulation. *DNA And Cell Biology*, 2002. 21(4): p. 297-306.
136. Tondeleir, D., J. Vandekerckhove, and C. Ampe, Actin and Actin Filaments, in *eLS*. 2011, John Wiley & Sons, Ltd.



137. Tseng, H.Y., et al., The melanoma-associated antigen MAGE-D2 suppresses TRAIL receptor 2 and protects against TRAIL-induced apoptosis in human melanoma cells. *Carcinogenesis*, 2012. 33(10): p. 1871-81.
138. van der Meijden, C.M., et al., Selective expression of specific histone H4 genes reflects distinctions in transcription factor interactions with divergent H4 promoter elements. *Biochim Biophys Acta*, 1998. 23(1): p. 82-100.
139. van der Watt, P.J., et al., The Karyopherin proteins, Crm1 and Karyopherin  $\beta$ 1, are overexpressed in cervical cancer and are critical for cancer cell survival and proliferation. *International Journal of Cancer*, 2009. 124(8): p. 1829-1840.
140. Van Slambrouck, S., et al., Reorganization of the integrin alpha2 subunit controls cell adhesion and cancer cell invasion in prostate cancer. *Int J Oncol*, 2009. 34(6): p. 1717-26.
141. Velusamy, T., et al., Recurrent reciprocal RNA chimera involving YPEL5 and PPP1CB in chronic lymphocytic leukemia. *Proceedings of the National Academy of Sciences*, 2013. 110(8): p. 3035-3040.
142. Vie, N., et al., Overexpression of phosphoserine aminotransferase PSAT1 stimulates cell growth and increases chemoresistance of colon cancer cells. *Mol Cancer*, 2008. 7(14): p. 1476-4598.
143. Wang, S. and M.D. Basson, Integrin-linked kinase: a multi-functional regulator modulating extracellular pressure-stimulated cancer cell adhesion through focal adhesion kinase and AKT. *Cell Oncol*, 2009. 31(4): p. 273-89.
144. Wang, W., et al., Mechanisms of acquired chemoresistance to 5-fluorouracil and tomudex: thymidylate synthase dependent and independent networks. *Cancer Chemotherapy and Pharmacology*, 2007. 59(6): p. 839-845.
145. Wang, X., et al., Identification of triosephosphate isomerase as an anti-drug resistance agent in human gastric cancer cells using functional proteomic analysis. *J Cancer Res Clin Oncol*, 2008. 134(9): p. 995-1003.
146. Wang, Z.Q., et al., BCAT1 expression associates with ovarian cancer progression: possible implications in altered disease metabolism. *Oncotarget*, 2015. 10: p. 10.
147. Welsh, S.J., et al., The redox protein thioredoxin-1 (Trx-1) increases hypoxia-inducible factor 1alpha protein expression: Trx-1 overexpression results in increased vascular endothelial growth factor production and enhanced tumor angiogenesis. *Cancer Res*, 2002. 62(17): p. 5089-95.
148. Willmann, L., et al., Exometabolom analysis of breast cancer cell lines: Metabolic signature. *Scientific Reports*, 2015. 5: p. 13374.
149. Wu, F.-H., et al., Extracellular HSPA1A promotes the growth of hepatocarcinoma by augmenting tumor cell proliferation and apoptosis-resistance. *Cancer Letters*, 2012. 317(2): p. 157-164.
150. Wu, W., et al., Catechol-O-methyltransferase, a new target for pancreatic cancer therapy. *Cancer Sci*, 2015. 106(5): p. 576-83.
151. Wu, X., et al., Molecular mechanisms of fatty acid synthase (FASN)-mediated resistance to anti-cancer treatments. *Advances in Biological Regulation*, 2014. 54: p. 214-221.

152. Xu, J., S. Lamouille, and R. Derynck, TGF-beta-induced epithelial to mesenchymal transition. *Cell Res*, 2009. 19(2): p. 156-72.
153. Xu, Y., et al., Cell type-restricted activity of hnRNPM promotes breast cancer metastasis via regulating alternative splicing. *Genes Dev*, 2014. 28(11): p. 1191-203.
154. Yang, Z., et al., Adenine Nucleotide (ADP/ATP) Translocase 3 Participates in the Tumor Necrosis Factor-induced Apoptosis of MCF-7 Cells. *Molecular Biology of the Cell*, 2007. 18(11): p. 4681-4689.
155. Young, J.C., et al., The nuclear import factor importin  $\beta$ 4 can protect against oxidative stress. *Biochimica et Biophysica Acta (BBA) - Molecular Cell Research*, 2013. 1833(10): p. 2348-2356.
156. Zamanian-Daryoush, M., et al., The Cardioprotective Protein Apolipoprotein A1 Promotes Potent Anti-tumorigenic Effects. *Journal of Biological Chemistry*, 2013. 288(29): p. 21237-21252.
157. Zhang, X., et al., Kinectin-mediated endoplasmic reticulum dynamics supports focal adhesion growth in the cellular lamella. *Journal of Cell Science*, 2010. 123(22): p. 3901-3912.
158. Zhang, Y., et al., GNAI3 inhibits tumor cell migration and invasion and is post-transcriptionally regulated by miR-222 in hepatocellular carcinoma. *Cancer Letters*, 2015. 356(2, Part B): p. 978-984.
159. Zhao, C., et al., Circulating haptoglobin is an independent prognostic factor in the sera of patients with epithelial ovarian cancer. *Neoplasia (New York, N.Y.)*, 2007. 9(1): p. 1-7.
160. Zhi, X., et al., RNAi-mediated CD73 suppression induces apoptosis and cell-cycle arrest in human breast cancer cells. *Cancer Science*, 2010. 101(12): p. 2561-2569.
161. Zhou, J., et al., Downregulation of LRPPRC induces apoptosis in prostate cancer cells through the mitochondria-mediated pathway. *Cancer Biother Radiopharm*, 2014. 29(9): p. 345-50.
162. Zimmermann, R., L. Müller, and B. Wullich, Protein transport into the endoplasmic reticulum: mechanisms and pathologies. *Trends in Molecular Medicine*, 2006. 12(12): p. 567-573.
